1 **Differential integration of activation and repression signals in a multi-enhancer system**

2

3

4

5 Peter H. Whitney, Bikhyat Shrestha<sup>1</sup>, Jiahan Xiong<sup>1</sup>, Tom Zhang, and Christine A. Rushlow\*

6 Department of Biology, New York University, New York, NY 10003, USA.

7

8 <sup>1</sup>These authors contributed equally

9 \*Correspondence: [car2@nyu.edu](mailto:car2@nyu.edu)

10

11

12

13 KEY WORDS: shadow enhancers, MS2 live imaging, transcriptional kinetics, morphogen  
14 gradient

15

16

## 17 **SUMMARY STATEMENT**

18 Non-intuitive shadow enhancer synergies are revealed by measuring transcriptional kinetics at  
19 the endogenous *short gastrulation* locus, giving rise to distinct patterning consequences in the  
20 dorsal ectoderm of *Drosophila* embryos.

21

22

## 23 **ABSTRACT**

24 Transcription in the early *Drosophila* blastoderm is coordinated by the collective action of  
25 hundreds of enhancers. Many genes are controlled by so-called “shadow enhancers,” which  
26 provide resilience to environment or genetic insult, allowing the embryo to robustly generate a  
27 precise transcriptional pattern. Emerging evidence suggests that many shadow enhancer pairs  
28 do not drive identical expression patterns, however the biological significance of this remains  
29 unclear. In this study we characterize the shadow enhancer pair controlling the gene *short*  
30 *gastrulation* (*sog*). We removed either the intronic proximal enhancer or the upstream distal  
31 enhancer, and monitored *sog* transcriptional kinetics. Notably, each enhancer differs in *sog*  
32 spatial expression, timing of activation, and RNA Polymerase II loading rates. Additionally,  
33 modeling of individual enhancer activities demonstrates that these enhancers integrate  
34 activation and repression signals differently. While activation is due to the sum of the two  
35 enhancer activities, repression appears to depend on synergistic effects between enhancers.  
36 Finally, we examined the downstream signaling consequences resulting from the loss of either  
37 enhancer, and found changes in tissue patterning that are well explained by the differences in  
38 transcriptional kinetics measured.

39

40

## 41 **INTRODUCTION**

42 *Drosophila* blastoderm development occurs rapidly over the course of 3 hours. During this time,  
43 all of the major tissue types are specified through a burst of intricate transcriptional regulation  
44 that culminates in the dramatic morphogenic events of gastrulation (reviewed in Stathopoulos  
45 and Newcomb, 2020). This period of development is a powerful system to study transcriptional  
46 regulation of developmentally relevant genes. In this study we explore the conserved  
47 phenomenon of “shadow” enhancers, first described in *Drosophila* (Hong et al., 2008).

48 Enhancers are cis-regulatory elements that interact with transcription factors, and are capable of  
49 producing precise transcriptional outputs by employing a combinatorial logic of bound activators  
50 and repressors. Shadow enhancers have overlapping activities, that is, they activate

51 transcription of the same gene in nearly identical patterns and are thought to provide robustness  
52 to the system (Frankel et al., 2010; Perry et al., 2010; Perry et al., 2011).

53  
54 Further experiments have shown that shadow enhancers are widespread in developmentally  
55 relevant genes, and appear in multiple organisms, including humans (reviewed in Kvon et al.,  
56 2021). Gene editing and transgenic constructs have demonstrated that despite overlapping  
57 activities, RNA production from shadow enhancer pairs can deviate significantly, and multiple  
58 modes of enhancer interactions between shadow enhancer pairs have been identified. Shadow  
59 enhancers are said to have an *additive* interaction if the sum of the RNA produced from each  
60 individual enhancer matches what is produced from the wildtype enhancer pair. *Sub-additive*  
61 interactions are described as the sum of RNA produced being more than the wildtype RNA,  
62 while *super-additive* interactions describe the opposite. Finally, *repressive* interactions are the  
63 result of RNA from one enhancer exceeding the amount from the wildtype pair, suggesting that  
64 one of the enhancers is capable of repressing the output of the other (Kvon et al., 2021).

65  
66 One of the first described shadow enhancer pairs was discovered at the *short gastrulation (sog)*  
67 locus (Hong et al., 2008). When cloned into transgenic expression constructs, both enhancers  
68 produce the characteristic lateral stripe of *sog* expression (Hong et al., 2008; Liberman and  
69 Stathopoulos, 2009). A recent report suggested that the one of the two enhancers may have  
70 repressive activity (Dunipace et al., 2019), and while particularly interesting at a mechanistic  
71 level, it is currently difficult to postulate a biological mechanism for how two enhancers both  
72 capable of driving expression can inhibit the total output of RNA. Therefore, we were motivated  
73 to quantifiably dissect exactly which features of transcription each enhancer controls, as solely  
74 measuring the total RNA produced obscures the multiple mechanistic steps involved in  
75 transcription. This would give a better understanding of transcriptional control by shadow  
76 enhancers more broadly, as the majority of genes active during early development have been  
77 shown to possess shadow enhancers.

78  
79 To accomplish this, we first created several *Drosophila* lines with endogenous enhancer  
80 deletions to study the developmental consequences of abnormal *sog* expression. We inserted  
81 MS2 tags (see Methods) into the first intron of *sog* in all lines allowing us to compare  
82 transcription directly to wildtype alleles in fixed embryos, and to measure transcription in real  
83 time to examine how each enhancer modifies the parameters that define transcriptional output.  
84 We found that the *sog* enhancers have distinct but overlapping domains of expression, with

85 individual enhancers capable of modifying different kinetic variables of transcription that  
86 combine in a manner that leverages the strength of each individual enhancer. This analysis also  
87 revealed that repression, but not activation, appears to be synergistic between the enhancers.  
88 Finally, we examined how altered transcription from the loss of individual enhancers leads to  
89 idiosyncratic downstream phenotypic consequences that are well explained by differences in the  
90 expression profile each enhancer alone generates.

91  
92

## 93 **RESULTS**

### 94 Proximal and Distal enhancers of *sog* are together necessary to drive early blastoderm 95 expression pattern

96 Early *sog* expression is controlled by two enhancers, originally known as “primary” or “intronic”  
97 and “shadow”, but also, and herein, referred to as “proximal” and “distal,” respectively (Dunipace  
98 et al., 2019; Hong et al., 2008). Fig. 1A shows the location of these two enhancers with respect  
99 to the transcription start site (arrow), with the distal enhancer located 20kb upstream (blue  
100 rectangle), and the proximal enhancer located approximately 1.5kb downstream within the first  
101 intron (green rectangle). Fig. 1B shows the location of key transcription factor binding sites in  
102 each enhancer that are largely responsible for the transcriptional domain of *sog*. Dorsal (DI)  
103 serves as the primary transcriptional activator across the dorsal/ventral (D/V) axis while Zelda  
104 (Zld) potentiates DI activity down the morphogen gradient, and Snail (Sna) represses activity in  
105 the mesoderm, resulting in the broad lateral stripes of the *sog* pattern (Lieberman and  
106 Stathopoulos, 2009; Foo et al., 2014).

107  
108 To better understand the individual roles of these enhancers, we created enhancer deletion  
109 lines, in which we simultaneously inserted MS2 live-imaging tags within the first intron (Fig. 1C,  
110 turquoise rectangle) via CRISPR-Cas9 homology directed repair editing (see Methods). In order  
111 to maintain the spacing between the MS2 loops and the promoter in the proximal enhancer  
112 deletion, we adapted a “neutral” DNA sequence of identical size and GC content from Scholes  
113 et. al. (Scholes et al., 2019) to replace the proximal enhancer (Fig. 1C, yellow rectangles; see  
114 Methods). The wildtype enhancer allele, proximal enhancer deletion allele, and distal enhancer  
115 deletion allele will hereafter be referred to as *WTsogMS2*,  $\Delta P$ *sogMS2*,  $\Delta D$ *sogMS2*, respectively,  
116 and the double enhancer deletion allele as  $\Delta P\Delta D$ *sogMS2*.

117

118 To evaluate the fitness of our alleles, we performed lethal counts by counting the ratio of  
119 unhatched to hatched larvae from homozygous lines over a period of 36 hours (Fig. 1C, right).  
120 Both enhancer deletion lines showed increases in the number of unhatched larvae, with flies  
121 carrying  $\Delta DsogMS2$  showing larger losses in viability than those with  $\Delta PsogMS2$ .  
122  $\Delta P\Delta DsogMS2$  failed to produce any homozygous flies, and therefore was assumed to be  
123 embryonic lethal. To evaluate the *sog* expression domains of these embryos, we performed  
124 colorimetric *in situ* hybridization for *sog* transcripts (see Methods). All alleles produced a *sog*  
125 expression pattern of varying intensity with the exception of  $\Delta P\Delta DsogMS2$ , which gave no  
126 apparent *sog* expression. We therefore concluded that both enhancers are necessary for *sog*  
127 expression, but a single enhancer is at least sufficient to generate some *sog* expression. In  
128 addition, *sog* does not appear to contain any other enhancers that drive early expression.

129

### 130 Enhancer deletions appear to integrate position and output information separately

131 Because enhancers regulate gene expression at the level of transcription, we wanted to assess  
132 how each of the enhancers contribute to *sog* transcriptional output. To do this in a quantitative  
133 manner, we first turned to single molecule fluorescence in situ hybridization (smFISH), which is  
134 capable of producing fluorescence that scales linearly with the amount of RNA stained. We  
135 focused on measuring nascent transcripts, which can be seen in nuclei as large foci. To  
136 internally control for the dynamic nature of *sog* expression, particularly when ventral repression  
137 sets in during NC14, we crossed our MS2-tagged flies to wildtype flies to create *sog*  
138 heterozygous embryos. This allows us to directly compare both the level and domain of  
139 transcription of wildtype *sog* to enhancer deletion *sog*.

140

141 As diagrammed in Fig. 2A, the alleles can be discriminated through the use of two probe sets, a  
142 *sog* 5' exonic-directed probe that labels both alleles in heterozygous flies (magenta), and a  
143 second probe set targeting the MS2 region and thus only the MS2 allele (cyan). This allows us  
144 to quantify transcriptional differences at the level of single nuclei (see Fig. 2B schematic of  
145 labeled foci). Fig. 2C shows the *sog* domain of a heterozygous *WTsogMS2*/wildtype embryo  
146 using this double labeling system in combination with an anti-DI antibody. Note the *WTsogMS2*  
147 foci are white because of the dual labeling of magenta and cyan probes, while the wildtype foci  
148 are magenta since they are not labeled with the MS2 probe. For a more detailed explanation of  
149 allele discrimination and image analysis, see Fig. S1 and Methods.

150

151 The double labeling assay allows us to internally control for fluorescence of nascent transcripts  
152 by examining nuclei that have both alleles active and taking a log ratio between the intensity of  
153 the two magenta foci to look for upregulation or downregulation of *sog*, which will give positive  
154 or negative values respectively. To ensure that our *WTsogMS2* allele operates identically to our  
155 unlabeled wildtype allele, we plotted this ratio across the D/V axis and found minimal  
156 fluctuations around 0, indicating that there is no change in *sog* output with the addition of our  
157 MS2 tag (Fig. 2D, orange line). In contrast,  $\Delta PsogMS2$  showed significant downregulation in the  
158 mesoderm but trended towards wildtype levels in the dorsal portion of the pattern (Fig. 2D, blue  
159 line), and  $\Delta DsogMS2$  again displayed the opposite trend (Fig. 2D, green line). This suggests  
160 that the two enhancers regulate transcriptional output differentially active across the *sog*  
161 domain.

162  
163 To further investigate the idea of enhancers having a spatial preference, we assessed the  
164 percentage of MS2-expressing nuclei in bins across the *sog* domain, including in the count not  
165 only nuclei with both alleles active, but also those with only the MS2 allele active (monoallelic  
166 expression). The *WTsogMS2* allele showed robust activation across the *sog* domain, with major  
167 reductions in activity at the ventral and dorsal extremes of the domain (Fig. 2E, orange curve).  
168 In contrast, the  $\Delta PsogMS2$  allele showed a significant decrease in activation on the ventral end  
169 of the pattern (Fig. 2E, blue curve), and the  $\Delta DsogMS2$  allele showed the opposite trend with  
170 significant decreases in the dorsal end of the pattern (Fig. 2E, green curve). Additionally, neither  
171 of the deletion alleles showed as robust an activation as the *WTsogMS2* allele in the lateral  
172 portion of the domain.

173  
174 These results suggest that the transcriptional domain displayed by *sog* is the result of the two  
175 separate enhancers summing their individual domains, in a manner that displays simple  
176 additivity at the borders of the *sog* domain, and sub-additivity towards the center. This sub-  
177 additivity likely arises from a complete saturation of activation in the center of the pattern, i.e.,  
178 there are simply no more nuclei to activate, rather than any particular transcriptional mechanism  
179 that causes the enhancers to integrate their activation signals in a fundamentally different way  
180 across the D/V axis. This simple framework is potentially broadly applicable across multiple  
181 shadow enhancer pairs, as it agrees with several previous studies where shadow enhancers  
182 appear to aid in creating robust borders to the transcriptional patterns they give rise to (Perry et  
183 al., 2011; El-Sherif and Levine, 2016; Dunipace et al., 2019; Scholes et al., 2019).

184

185 We then focused on only the monoallelic-expressing nuclei to determine if the occurrence of  
186 monoallelic expression was differentially influenced by either enhancer at any point in the *sog*  
187 domain. We found a bimodal distribution of MS2 monoallelic expression for the *WTsogMS2*  
188 allele, with peaks of monoallelic expression on both ends of the *sog* domain (Fig. 2F, orange  
189 curve). This is consistent with earlier reports that have suggested that monoallelic expression  
190 occurs more frequently on the border of transcriptional domains (Hoppe et al., 2020). When we  
191 examined the enhancer deletion lines, we found a similar trend to the previous experiment,  
192 where the dorsal peak of monoallelic expression vanished in our  $\Delta PsogMS2$  (Fig. 2F, blue  
193 curve), and the ventral peak absent in the  $\Delta DsogMS2$  allele (Fig. 2F, green curve). Strikingly,  
194 the peak that was not absent in each deletion allele remained at exactly the level we observed  
195 in wildtype (Fig. 2F, note region of overlap among the three curves). This suggests that  
196 monoallelic expression in shadow enhancer pairs may be largely driven by single enhancers  
197 acting alone. Taken together, these observations demonstrate that each of the *sog* enhancers  
198 has a preferred domain along the D/V axis, and when combined together create the wildtype  
199 pattern.

200

#### 201 MS2 live imaging shows shadow enhancers separately integrate kinetic properties of 202 transcription

203 Next, we wanted to explore how control of transcriptional kinetics differed between the two  
204 enhancers. Measuring nascent transcription in fixed tissue confounds two critical variables, the  
205 timing of activation and the rate of transcript production. In order to examine these two  
206 variables, we turned to live imaging to visualize the number of nascent transcripts produced  
207 over time utilizing our endogenously inserted MS2 tag. Fig. 3A describes how MS2 live imaging  
208 operates with the intronically inserted MS2 loops, with MCP-GFP binding detectable only to  
209 transcripts that have not yet been spliced out of the first intron. Imaging was performed on the  
210 portion of the embryo that includes the *sog* expression domain from NC12 to mid-NC14, at  
211 which point the defined line of ventral repression in *sog* becomes apparent (see schematic in  
212 Fig. 3B, still images in Fig. 3C, and representative Movies S1-S3).

213

214 In order to characterize the *sog* transcriptional activity of each line and to validate the fidelity of  
215 our live imaging system, we counted the number of foci seen in each nuclear cycle relative to  
216 the number of nuclei (Fig. 3C). We classified foci position into four categories across the *sog*  
217 domain: ventral, ventral/lateral, dorsal/lateral, and dorsal, with the ventral position  
218 encompassing any foci detected in the presumptive mesoderm. Broadly, we observed that

219 *WTsogMS2* and  $\Delta DsogMS2$  produced similar numbers of MS2 active nuclei, with the exception  
220 of the dorsal most position (see Fig. 4D histograms). This is in contrast to the activity of  
221  $\Delta PsogMS2$ , which nearly universally underproduced relative to *WTsogMS2*. This is most  
222 striking in NC12, where barely any transcriptional activity was observed (Fig. 4D, blue bars).  
223 Furthermore, in NC14,  $\Delta PsogMS2$  produced very little transcription in the ventral most bin,  
224 which suggests that the distal enhancer is more sensitive to Sna-mediated repression. The  
225 results of this analysis at NC14 are consistent with our fixed imaging data (Fig. 2D),  
226 demonstrating that the MS2 system is faithfully reporting on the transcriptional output of *sog*.

227  
228 To better understand how activity differs between the enhancers, we analyzed single nuclei in  
229 the manner outlined in Fig. 4A-B. Single foci were tracked and their voxel intensity values  
230 summed for each timepoint to produce a trace of MS2 activity over time. Then, several  
231 parameters were extracted from these traces:  $t_{on}$ , defined by the time at which a MS2 focus was  
232 first observed following the previous nuclear division; loading rate, which describes the rate of  
233 signal increase by fitting a line to values where the GFP signal first increases (Fig. 4B, purple  
234 line); and  $t_{off}$ , the time at which the signal is no longer detectable in that nucleus. All parameters  
235 were measured for nuclei across the D/V axis. We focused on NC13 and NC14 for this analysis,  
236 as these cycles produce far more activity than NC12 and are therefore more relevant to the total  
237 transcriptional output of *sog*.

238  
239 Fig. 4C shows the  $t_{on}$  times for each genotype at NC13 and NC14. With the exception of the  
240 most ventral bins, *WTsogMS2* activated transcription at a faster rate than both deletion  
241 genotypes.  $\Delta PsogMS2$  showed extremely delayed transcription at all positions and times, in line  
242 with the results of inefficient activation discussed above. However, when we examined the  
243 loading rates of all lines (shown in Fig. 4D),  $\Delta PsogMS2$  outperformed even *WTsogMS2* in most  
244 cases, and greatly outperformed  $\Delta DsogMS2$ , which had loading rates that fell severely in the  
245 more dorsal bins. All genotypes showed lower loading rates in the ventral bins, likely driven by  
246 Sna-mediated repression of *sog*.

247  
248 With these apparently opposing enhancer activities for activation and loading rates, we wanted  
249 to create a metric that would describe the total transcriptional output of each genotype. To do  
250 this, we adapted an approach used by Garcia et al. (2013) that described transcriptional output  
251 by combining multiple parameters of transcription (diagrammed in Fig. 4E). For each bin, we  
252 multiplied the time active (duration of  $t_{on}$ ; Fig. 4B, white area) by the loading rate for each



253 nucleus. The average value obtained in each bin was then multiplied by the fraction of nuclei  
254 with detectable transcription to normalize the differences in activation seen across the  
255 genotypes. Total output values are plotted in Fig. 4F, showing that *WTsogMS2* generates the  
256 most activity by this metric. Thus, although at first glance it appeared that the distal enhancer  
257 when acting alone drives higher transcriptional activity than when the distal and proximal are  
258 combined (Fig. 4D; also shown by Dunipace et al. (2019), this is not the case when taking into  
259 account all transcription variables to determine total output.

260  
261 Curiously, the only point *WTsogMS2* is not highest in this metric is in the most ventral bin in  
262 NC14, where  $\Delta DsogMS2$  showed higher total output (see Fig. 4F, NC 14, compare orange and  
263 green lines in mesoderm). This result indicates a repressive interaction between the two  
264 enhancers, as an additive interaction is always indicated by the wildtype enhancer pair showing  
265 the highest output.

266  
267 Modeling the rate of activation predicts potential cross-talk of repression, but not activation

268 To address this finding, we wondered if it was possible to construct the observed wildtype  
269 transcriptional activation and repression of *sog* over time, using the kinetic parameters gathered  
270 from the enhancer deletion lines. By building a model of each individual enhancer's activity over  
271 time, we could simulate what would be observed if those enhancers operated in the same  
272 nucleus, but did not interact when driving *sog* transcription. We could then compare the output  
273 of this simulation to the transcriptional activity observed in *WTsogMS2* embryos, where any  
274 significant deviations from the model's prediction and the data could be interpreted as potential  
275 synergy between the enhancers.

276  
277 In order to simulate enhancer activity, we first fit gamma distributions to the  $t_{on}$  and  $t_{off}$  values  
278 obtained for each genotype across the D/V axis at NC14. These distributions were then refined  
279 by systematically altering the shape and rate parameters of each distribution until the  
280 differences between simulated nuclei and the observed activity over time were minimized (see  
281 Methods). During simulation, distributions of  $t_{on}$  and  $t_{off}$  for each nucleus were sampled  
282 independently, assuming no correlation between a nucleus' activation time and the time of loss  
283 of signal (see Fig. S2 for validation of this assumption).

284  
285 Fig. 5A shows the output of simulations based on our model expressed as the percentage of  
286 active nuclei over time (solid line) plotted over the data gathered from our NC14 live-imaging

287 experiments (open circles). Note the near perfect overlap for all genotypes, indicating the  
288 distributions of  $t_{on}$  and  $t_{off}$  values chosen are sufficient to describe the data. Beside each plot is  
289 shown the distributions of  $t_{on}$  (pink) and  $t_{off}$  (blue) values generated from sampling the fit gamma  
290 distributions. For a breakdown of distributions and fits for all D/V bins, see Fig. S3.

291  
292 Having found parameters for all distributions that can accurately describe the data of individual  
293 enhancers based on data from our enhancer deletion lines, we created a combined model that  
294 simulates the activity of both enhancers in a single nucleus. Nuclei remain “on” if at least one  
295 enhancer is simulated to be active based on the values obtained by sampling  $t_{on}$  and  $t_{off}$   
296 distributions obtained from each deletion line. This underlying assumption represents the null  
297 hypothesis that there is no interaction between the enhancers, and the activity seen in  
298 *WTsogMS2* is based purely on the combined activity of the proximal and distal enhancers. Fig.  
299 5B shows conceptually how the model interprets multiple sets of  $t_{on}$  and  $t_{off}$  values sampled from  
300 each pair of distributions for the two enhancer deletion genotypes. In this example, the faster  
301 acting proximal enhancer is responsible for the initial activation of *sog* (green), while the slower  
302 acting distal enhancer activates later (blue), with a brief period of overlapping activity of both  
303 enhancers (orange) that maintains continuity of transcription.

304  
305 Using this combined model, we simulated an additional 10,000 nuclei for each bin across the  
306 D/V axis, and compared the results to the observed activation kinetics of *WTsogMS2*. While in  
307 all D/V bins the rate of activation was remarkably well predicted by the model (Fig. 5C, see  
308 overlap between initial rise in curves), the rate of deactivation was not, and a dramatic  
309 overactivation of the model output compared to the data was seen in the ventral bins (Fig. 5C,  
310 note different curve heights). This rigorously demonstrates that the strong repression  
311 experienced by the distal enhancer in the mesoderm is somehow influencing the ability of the  
312 proximal enhancer to activate transcription in *WTsogMS2* embryos. Additionally, it identifies the  
313 key parameter from which the repressive interaction arises, clearly implicating Sna-mediated  
314 repression, not DI-activation. Understanding this form of crosstalk between enhancer pairs is  
315 likely critical for creating a unified model of enhancer biology. For a more detailed look at the  
316 implications of this finding and possible underlying mechanisms, see Discussion.

317  
318 *sog* Enhancer deletions affect downstream signaling events in late blastoderm embryos

319 With a better understanding of the kinetic features of *sog* transcription, we wanted to evaluate  
320 the downstream developmental effects that occur due to the loss of a single *sog* enhancer. To

321 observe developmental consequences of the *sog* enhancer deletions, we measured the  
322 developmental morphogen gradient that Sog protein is directly involved in refining: the dorsally  
323 located gradient of phospho-Mothers Against Decapentaplegic (pMAD). As diagrammed in Fig.  
324 6A, Sog protein produced in ventro-lateral cells diffuses dorsally, where it inhibits activity of the  
325 TGF- $\beta$  homolog Decapentaplegic (Dpp), resulting in a gradient of Dpp (Shimmi et al., 2005;  
326 Wang and Ferguson, 2005). Dpp signal transduction leads to the phosphorylation of MAD, and  
327 in early NC14 it initially creates a broad region of pMAD. Sog protein binds to Dpp, preventing it  
328 from creating high levels of pMAD in the lateral regions of the embryo, and continued Sog  
329 diffusion eventually restricts pMAD to a DI stripe 4-5 nuclei wide (Dorfman and Shilo, 2001;  
330 Rushlow et al., 2001; Sutherland et al., 2003). By staining embryos with anti-pMAD antibodies,  
331 we can visualize any impairments in pMAD-domain formation that may be caused by *sog*  
332 enhancer deletions.

333  
334 Fig. 6B shows the results of pMAD antibody staining on homozygous *WTsogMS2* mid and late  
335 NC14 embryos. Due to the continued production of Sog protein, we see a narrowing of the  
336 pMAD domain. To quantify total pMAD levels, we measured the intensity of pMAD staining and  
337 plotted it over the dorsal position centered on the peak of maximum pMAD staining (Fig. 6C).  
338 Interestingly, the  $\Delta DsogMS2$  and  $\Delta PsogMS2$  alleles show peak pMAD intensity nearly identical  
339 to wildtype, suggesting that only a small input of *sog* activity is required to increase the level of  
340 pMAD seen in the dorsal-most cells. This is in contrast to max pMAD levels seen in  
341  $\Delta P\Delta DsogMS2$ , which completely fail to refine into a narrow peak. However, single enhancer  
342 deletions produced an overall broader distribution of pMAD staining.  $\Delta DsogMS2$  embryos gave  
343 the broadest pMAD domain, which is consistent with the rank order of total output of *sog* (Fig.  
344 4F).

345  
346 Because we found large differences in the onset of transcription in our enhancer deletions, we  
347 were interested to see if this influenced the timing of pMAD refinement. To test this, we plotted  
348 the width of the pMAD domain of both mid and late NC14 embryos for all genotypes (Fig. 6D).  
349 As expected, *WTsogMS2* embryos refine their pMAD domain over these two timepoints.  
350  $\Delta PsogMS2$  embryos carry out a more extreme refinement, initially showing a far larger pMAD  
351 domain. In contrast,  $\Delta DsogMS2$  embryos initially show a modestly expanded pMAD domain  
352 less so than  $\Delta PsogMS2$  embryos, however this undergoes no appreciable change in late NC14.  
353 Finally,  $\Delta P\Delta DsogMS2$  displays an incredible expansion of the pMAD domain, which in the  
354 absence of any *sog* production, does not undergo any subsequent retraction.

355

356 These results are well explained by our MS2 data, which showed significant delays in the onset  
357 of transcription of *sog* in  $\Delta P_{sog}MS2$  embryos. However, the high loading rates achieved by the  
358 distal enhancer allow  $\Delta P_{sog}MS2$  embryos to eventually produce enough Sog protein to refine  
359 the pMAD gradient. The lack of refinement of pMAD in  $\Delta D_{sog}MS2$  is likely due to the inability of  
360 the primary enhancer alone to continuously produce *sog* transcripts late into NC14.

361

362 To determine if the changes in the pMAD gradient impact the expression domains of pMAD  
363 target genes, we performed colorimetric *in situ* hybridization for two representative pMAD  
364 targets; *u-shaped* (*ush*), thought to be an “early” pMAD target, and *hindsight* (*hnt*), thought to be  
365 a “late” pMAD target (Hoppe et al., 2020) (Fig. 6E). Patterns observed in *ush* stained embryos  
366 show  $\Delta P_{sog}MS2$  embryos more severely affected, creating broad domains of expression  
367 matching those found in the  $\Delta P\Delta D_{sog}MS2$ . *hnt* staining patterns show the opposite, with  
368  $\Delta P_{sog}MS2$  patterns appearing nearly wildtype, and  $\Delta D_{sog}MS2$  embryos showing a pattern  
369 similar to, but stronger than,  $\Delta P\Delta D_{sog}MS2$ . These results suggest that the changes observed in  
370 pMAD stainings functionally impacts the subsequent patterning steps, and that changes in the  
371 onset and rate of transcription of *sog* have specific and defined consequences in the selection  
372 of dorsal fates.

373

374

## 375 **DISCUSSION**

376 In this study we sought to understand how two shadow enhancers collectively contribute to the  
377 output of a gene. We utilized fixed and live imaging techniques to characterize the position,  
378 timing, and rate of transcription of each enhancer separately. Far from being redundant, we  
379 found these enhancers contributed to different aspects of transcription, and loss of enhancers  
380 produced different downstream consequences for development in terms of altered tissue  
381 patterning and embryo survivability. Additionally, by separating out different key features of  
382 transcription, we have shown that enhancer additivity functions differently at particular steps in  
383 transcriptional activation and repression.

384

### 385 Shadow enhancers show positional preferences along the D/V axis

386 Our fixed imaging experiments demonstrated that the proximal and distal enhancers contribute  
387 to the ventral and dorsal locations of the *sog* transcriptional pattern, respectively, with the  
388 highest overlapping activity located in the lateral region of the pattern (Fig. 2). Higher rates of

389 monoallelic expression were seen on both edges of the *sog* pattern in *WTsogMS2* embryos,  
390 which are presumably the result of reduction in the frequency of activation the farther away a  
391 given nucleus is from the target region of *sog* expression encoded by the enhancers. This is  
392 supported by the observation that the peak of monoallelic expression found at either end of the  
393 pattern disappears when the enhancer that has a preference for that position is lost. However, it  
394 is unclear whether monoallelic expression represents a complete loss of activity from a single  
395 allele, or if a small amount of activity remains, but has dipped below our detection threshold for  
396 nascent transcription.

397

### 398 Shadow enhancers interact to mediate repression

399 Modeling of enhancer activity found that the collective action of the two enhancers complement  
400 each other in mostly an additive fashion, that is, the action of the two enhancers together can be  
401 adequately explained by assuming that there is no mechanistic interaction between them.  
402 However, this is not the case in the ventral portion of the D/V axis where *Sna* acts to repress  
403 transcription of *sog*. Instead, there appears to be enhanced repression by the proximal  
404 enhancer in the presence of the distal enhancer, as seen in Fig. 5C where the prediction of our  
405 model deviates from the observed *WTsogMS2* data, indicating interaction between the two  
406 enhancers.

407

408 The cause of this effect is unknown, but a plausible mechanism can be postulated based on the  
409 current understanding of *Sna*-mediated repression. *Sna* works to repress transcription in the  
410 early embryo by the recruitment of the co-repressor dCtBP, which is thought to operate at small  
411 genomic distances less than 200bp (Keller et al., 2000). In the classic example of the short  
412 range repressive effect of dCtBP, Krüppel is responsible for repressing the activity of the *eve*  
413 stripe 2 enhancer to create the sharp posterior border of stripe 2. Located just 1.7kb away is the  
414 *eve* stripe 3+7 enhancer, which does not experience any repressive effects despite *eve* stripe 3  
415 being found in the domain where Krüppel is most active in the blastoderm embryo (Nibu et al.,  
416 1998). Importantly, the portion of the enhancer that drives stripe 3 is locally depleted for Krüppel  
417 binding sites (Vincent et al., 2018).

418

419 However, this lack of a shared repressor responsible for recruiting dCtBP is not the case for the  
420 enhancers of *sog*, where both enhancers contain binding sites for *Sna* (see Fig. 1B). Efficient  
421 recruitment of the co-repressor by high occupancy of *Sna* at the distal enhancer may amplify the  
422 action of *Sna* at the proximal enhancer by increasing the local concentration of dCtBP in the

423 microenvironment of the *sog* locus, thereby allowing Sna at the proximal enhancer to recruit  
424 dCtBP more efficiently. A modeling based approach that attempted to derive how enhancer  
425 sequence changes transcriptional output based on the binding characteristics of recruited  
426 transcription factors in *Drosophila* embryos found that Sna repression required uniquely high  
427 levels of homotypic cooperativity in the context of a single enhancer compared to all other  
428 repressors examined by the study (Fakhouri et al., 2010). It is unknown whether this  
429 cooperativity could scale to larger genomic distances, but repressive factors, including the  
430 *Ciona* Sna homologue, have been shown to form condensates that may extend the range of  
431 repressive activity (Treen et al., 2021).

432

#### 433 Shadow enhancers follow a “first come first serve” model for activation

434 In the case of activation, our data does not support any mechanism of super-additivity.  
435 Activation rates of *sog* are well predicted by a model that assumes enhancers act  
436 independently. Decreases in measured  $t_{on}$  values seen in *WTsogMS2* embryos are likely  
437 accounted for by the wide distribution of  $t_{on}$  times measured in  $\Delta PsogMS2$  embryos (Fig. 4C).  
438 Activation of *sog* by the distal enhancer occasionally precedes the proximal enhancer, thus  
439 modestly lowering the average  $t_{on}$  values in *WTsogMS2* embryos. However, in most cases, the  
440 proximal enhancer will activate first, and the later  $t_{on}$  value contributed by the distal enhancer will  
441 be “masked” and will therefore not contribute to raising the average  $t_{on}$  value. Because of this,  
442 we believe our data supports a “first come, first serve” model of enhancer activation.

443

444 Although we do see evidence that RNA Pol II loading rates are diminished in the *WTsogMS2*  
445 embryos when compared to  $\Delta PsogMS2$  embryos (Fig. 4D), potentially suggestive of so-called  
446 “enhancer interference” (Fukaya, 2021), we believe that this result is well explained by the initial  
447 activation of transcription being performed by the proximal enhancer in the majority of nuclei,  
448 which appears to drive much lower rates of transcription. This confounds our loading rate  
449 measurement, as the rise in signal intensity in *WTsogMS2* embryos is likely a composite of the  
450 two enhancers acting sequentially. Techniques that attempt to estimate the promoter state at  
451 any given time using an MS2 trace may be able to dissect out the individual contributions each  
452 enhancer makes, however we believe that this analysis is not required to explain our data.

453

#### 454 Altered downstream signaling is well predicted by differential transcription activity of shadow 455 enhancer mutants

456 Our study has uncovered the primary biologically relevant transcriptional parameters  
457 responsible for the phenotypic differences in the downstream signaling pathway of *sog*. The  
458 slower activating distal enhancer drives insufficient levels of *sog* to achieve the early refinement  
459 of the pMAD gradient. However, the high loading rates achieved by the distal enhancer enable  
460 enough build-up of Sog in the later stages of NC14 to eventually reach near wildtype restriction  
461 of the pMAD domain. In contrast, the faster acting proximal enhancer is capable of achieving an  
462 early contraction of the pMAD domain but fails to drive sustained expression of *sog* at high  
463 enough levels to continue this contraction. The expansion of the expression domain of the  
464 “early” pMAD target gene *ush*, but not the “late” pMAD target gene *hnt* seen in  $\Delta PsogMS2$   
465 embryos, while the opposite is seen in  $\Delta DsogMS2$  embryos, give good indication of the validity  
466 of this model.

467

#### 468 Evolutionary considerations for shadow enhancer pairs

469 With this in mind the question naturally arises: why have two enhancers at all, if it is possible to  
470 achieve this result with only one? Based on our previous work on the distal enhancer in reporter  
471 constructs, we know that placement of the distal enhancer directly upstream of a promoter is  
472 capable of driving fast transcriptional activation at high levels (Yamada et al., 2019). Beyond  
473 increasing the robustness of transcription as proposed by previous studies of shadow  
474 enhancers (Frankel et al., 2010; Perry et al., 2010; Tsai et al., 2019), we believe our data  
475 elaborates on the original hypothesis that shadow enhancers act as a source for evolutionary  
476 novelty (Hong et al., 2008). In its original conception, the *de novo* creation of a shadow  
477 enhancer allows one of these enhancers to drift, potentially adding new functionality without  
478 disturbing the core role of the original transcriptional program.

479

480 An alternative view to this interpretation is that selection may favor the creation of enhancers  
481 that allow for the tuning of individual transcriptional parameters. In our study, loss of a single  
482 enhancer produced defined and unique differences in phenotypic outcomes based on the  
483 parameter that enhancer was principally responsible for controlling, either the activation speed  
484 in the case of the proximal enhancer, or loading rate in the case of the distal enhancer. By  
485 keeping these activities separate, mutations in either enhancer will create smaller, but more  
486 precise changes in the downstream patterning events, reducing potential pleiotropy that would  
487 be present if *sog* was driven by a single enhancer. Overall, this partitioning of enhancer activity  
488 would allow for a more defined exploration of the landscape of potential phenotypes during  
489 periods of increased selective pressure.

490

491

## 492 MATERIALS AND METHODS

493

### 494 *Drosophila* lines

495 All flies were grown on standard fly (*Drosophila melanogaster*) cornmeal-molasses-yeast media.  
496 FLY stocks used in this study were: *y[1]w[1118]* (used as wildtype flies) and *y[1] sog[S6]/FM7c*,  
497 *sn[+]* (used as a *sog* null allele; Bloomington Stock Number 2497). *zld* embryos were made  
498 using UAS-*zld* shmir lines and the Gal4 driver, MTD as previously described (Sun et al., 2015)  
499 Flies of the genotype *y[1] w\**; *P{His2Av-mRFP1}II.2*; *P{nos-MCP.EGFP}2* (Bloomington Stock  
500 Number 60340) carried two transgenes, one on chromosome 3, *P{nos-MCP.EGFP}2*, which  
501 expresses the MS2 coat protein (MCP) fused to EGFP under the control of the *nanos* promoter  
502 active in oogenesis, and the other on chromosome 2, *P{His2Av-mRFP1}II.2*, which expresses  
503 RFP-tagged His2Av in all cells under the control of *His2Av*. Embryos from these and CRISPR  
504 engineered flies (see below) were collected on yeasted grape juice agar plates, aged, and either  
505 fixed or live imaged (see below).

506

### 507 Generation of engineered *sog* alleles

508 All engineered fly lines were created through CRISPR-Cas9 mediated homology directed repair.  
509 *sog* enhancer sequences that were deleted are listed below. Transgenic Cas9 flies were co-  
510 injected with pCDF5 plasmids encoding guides targeting relevant genomic targets and pGEM-T  
511 vectors containing homology repair templates. All injections were performed by BestGene.  
512 pGEMT donor DNA vectors were generated from fragments obtained through genomic PCR for  
513 homology arms, and sequences subcloned or PCR amplified from existing plasmids. All  
514 24xMS2 loops containing plasmids utilized the MS2 sequence found in the MS2v5(-TAG) vector  
515 (Yamada et al., 2019). The neutral spacer DNA in the primary deletion plasmid was generated  
516 using the spacer sequence found in Scholes et al. 2019 (Scholes et al., 2019) and was  
517 generated as a IDT (Integrated DNA Technologies) gene block. The 3x3P-RFP sequence  
518 (Berghammer et al., 1999; Sheng et al., 1997) for the distal deletion ( $\Delta D$ ) plasmid was a  
519 generous gift from the Desplan Lab. Plasmids were assembled using a combination of  
520 restriction enzyme digest and ligation, and Gibson assembly cloning. Primers used to create  
521 donor vectors for each fly line are listed below, along with the guide sequences associated with  
522 each injection. Plasmid sequences and maps can be found at <https://rushlowlab.bio.nyu.edu/>

523



524 sog enhancer sequences:

525 Proximal Enhancer (ChrX: 15,624,486..15,625,257):

526 tgaaaatgcaacaacggcagcgaaccaagaaagaaatagtggaaaaaaaggaaaaaaaactgcaactcggaacataat  
527 agtatgcaatatacacatacatattatgcatatataatataatgagtgtagggagtgagggggggttgcaaacaggaaatgcag  
528 ctaatcaagcgtgtgagttgcaacaaattgcaattgggtgccgcttatggtccatggtccataaccaccaatggtctatatacatgggca  
529 ggcattccattgggtatacccgtatcttttgtaagcggcttacggacgccgatgctgctgagcagcagtcaggcagcgagcgg  
530 aaggggaattcccgcttccggattaaaactggacacaataataaaaaaaaaaaaaagaaaacggagtgctatgctgtgccgtcg  
531 ggaatatcccatgtcccgaacacctggcgggattagaggtgagcagcaggtcccgcctcggcaccggctggaattctacctgcgatt  
532 acggggatttcccgcaccatacagccatatagccatatagccatatagcagacacggcgatgcgcaatggcattggcaactatgc  
533 aatcgagcggaggtagaaatgctgaaagcaacaggcaacagtaataccccttaactaaagattttgactagttcgaacttaagg  
534 atatgagcattgaaagtcgattaaaaactaaacctgataaataactcaaataacctattgaaatattgaaaactc

535

536 Distal Enhancer (ChrX: 15,646,594..15,647,337):

537 Atttaatcgaaggactgcaatgggcatatacaacaaattctacgataaaggattcaatattgattgttatgtttatggcagccaattgat  
538 gccgactgacctgtgtgtgtgtgtgtgtgtgtggaagctcaggatggacagattcccgggttcagcggaacaggtaggctggctgat  
539 cggaaattcccaccatacacatgtggctataatgccaacggcatcagaggtgcgaaaacagatgcagcctcataaaaggggagcag  
540 ataaggtcgcggttgcgtgggaaaagccatccgaccaggaccaggacgaagcagtgcggttgccgcatcattgccccatattctg  
541 ctattcctacctgcgtggccatggcgatattgtgcaaggataaggagcggggatcataaaacgctgctgtttgttatgctgcttatt  
542 aaattggcttctggcgggcttgcaacctggtgctagtcccaatcccaatcccaatccaatccgtataaccgtatccaatgcattcta  
543 cctgtcctgggaatttccgatttggccgaccatattggccacggatgctgagagtgctcctcgtgagcttagatcatcgtgggtattc  
544 gcagacaatcgggttattgtgccgattcgatgttgctctttggttttcggaaactctgaccaggtttcgggtttcgggttttgggtttt  
545 ccggccgcatcgtg

546

547 Primer and guide sequences:

548

549 *WTsogMS2*

550 Plasmid Primers:

551 5' Homology Arm Forward

552 5'-gcctggctgtgtgagtggttg

553 5' Homology Arm Reverse

554 5'-cgagatctctgtttatacaaaagtcttagc

555 3' Homology Arm Forward

556 5'-tgccgaatcgggtaggacgat

557 3' Homology Arm Reverse

558 5'-accggaacgaatatcgaatatgcaattggc

559 Guide Sequences:

560 5'-taaacagagatctcggaag\*

561 5'-aaacagagatctcggaagt\*

562

563 *ΔPsogMS2*

564 Plasmid Primers:

565 5' Homology Arm Forward

566 5'-gcctggctgtgtgagtgttg

567 5' Homology Arm Reverse

568 5'-cgagatctctgtttatacaaagtcttagc

569 3' Homology Arm Forward

570 5'-tgccgaatcgggtaggacgat

571 3' Homology Arm Reverse

572 5'-accggaacgaatatcgaatatgcaattggc

573 Guide Sequences:

574 5'-taaacagagatctcggaag\*

575 5'-aaacagagatctcggaagt\*

576 5'-gttgggattctgtttatcaa

577 5'-tgggcaaatagaaacggcgc

578

579 *ΔDsogMS2*

580 Plasmid Primers:

581 5' Homology Arm Forward

582 5'-gttttatgtccgtctggcgc

583 5' Homology Arm Reverse

584 5'-gatggctaaatgaataaaatgagttgcta

585 3' Homology Arm Forward

586 5'-gtcatctggtggcacaggac

587 3' Homology Arm Reverse

588 5'-gaaaggaattccacgtattcgctg

589 Guide Sequences:

590 5'-taaacagagatctcggaag\*

591 5'-aaacagagatctcggaagt\*

592 5'-gcagtccttcgattaaatga

593 5'-ccaccagatgacgcacgatg

594 \*Guides were used in every experiment to insert the 24x MS2 loops

595

596 Proximal+distal deletion( $\Delta P\Delta D$ ) flies were generated by injecting the  $\Delta D$  guide plasmid and  
597 donor plasmid on the background of the proximal deletion ( $\Delta P$ ) fly line homozygous for  
598 transgenic Cas9. Flies expected to contain 3x3P-RFP cassettes were screened for red  
599 fluorescence, all other lines were screened via PCR using primers that spanned the MS2  
600 insertion:

601 MS2 Screen Fwd

602 5'-tgacgtttgattagccaccagttggg

603 MS2 Screen Rev

604 5'-gccaacctcaactccaatctccg

605

#### 606 **Colorimetric *in situ* hybridization**

607 Embryos were collected and aged to be 1-3 hours old at room temperature and dechorionated  
608 in Clorox for two minutes. They were then fixed in 4% formaldehyde (1X PBS) and an equal  
609 volume of heptane for 25 minutes while shaking vigorously. Devitellinization was performed by  
610 pipetting off the bottom fixative phase and adding 4 mL of methanol and shaking vigorously for  
611 30s. Embryos were rinsed in methanol and transferred to ethanol for storage at  $-20^{\circ}\text{C}$ .  
612 Hybridization of fixed embryos used a standard *in situ* hybridization (ISH) protocol and DIG-  
613 labeled *sog* cDNA or *lacZ* RNA antisense probes; hybridized at  $55^{\circ}\text{C}$  overnight). Visualization of  
614 the labeled probe was done using anti-DIG-AP (alkaline phosphatase) antibodies (Roche  
615 Biochemicals) followed by histochemical enzymatic staining reagents (Roche Biochemicals).  
616 Embryos were mounted on slides with Aqua-Polymount (Polysciences) using 1.5 coverslips  
617 (Fisher Scientific), and imaged with Zeiss Axiophot DIC optics and a Zeiss Cam and ZEN2012  
618 software.

619

#### 620 **Single-Molecule Fluorescent *in situ* Hybridization (smFISH)**

621 Probe sets for smFISH were generated using the online Stellaris (LGC Biosearch Technologies)  
622 probe designer. *sog* probes were ordered to be conjugated to Atto-670, and MS2 probes were  
623 ordered to be conjugated to Atto-570. Embryos were fixed in the same manner outlined above,  
624 and stained following the *Drosophila* whole embryo staining protocol found on the Stellaris  
625 website (<https://www.biosearchtech.com/support/resources/stellaris-protocols>). After *in situ*

626 staining, embryos were washed 3x with PBS-Tris, and stained overnight at 4 degrees C with  
627 anti-Dorsal antibodies (see below) followed by staining with fluorescently labeled secondary  
628 antibodies for 1.5 hr at room temperature (see below).

629

### 630 **Antibody staining**

631 Antibody staining was performed at 4 degrees C for 16 hours followed by three 20 minute  
632 washes in PBS + 0.1% Tris pH 7.0. Anti-DI antibody (DI\_7A4) was obtained from the  
633 Developmental Studies Hybridoma Bank and used at 1:50 dilution. Anti-pMAD antibodies were  
634 obtained from Cell Signaling. Embryos were then stained with secondary antibodies: Alexa  
635 Fluor 488 anti-mouse or Alexa Fluor 488 anti-rabbit (ThermoFisher Scientific) for 1.5 hours at  
636 room temperature and washed in the same manner. After DAPI (D9542, Sigma-Aldrich) staining  
637 for 20 minutes, embryos were mounted on microscope slides using ProLong™ Diamond  
638 Antifade Mountant (ThermoFisher Scientific) and Number 1.5 glass coverslips (Fisher  
639 Scientific). Embryos were imaged with Zeiss 880 with Airyscan confocal microscope.

640

### 641 **Fixed tissue confocal imaging**

642 All confocal images were captured on an LSM Zeiss 880 microscope. Images for the pMAD  
643 experiments were captured using a 20X objective with 1.1 Digital Zoom and a 2000X800  
644 scanning area. Images all contained approximately 20 Z-planes. Laser power was set for lasers  
645 405nm at 0.5% and 488nm at 3%, with gain set at 750. Images for all smFISH experiments  
646 were captured using the Airyscan module, and processed using the suggested Airyscan  
647 Processing strength. These images were captured using a 40X objective with 1.0 Digital Zoom  
648 and a 2000X1500 scanning area. Images all contained approximately 50 Z-planes. Laser power  
649 was set at 0.5% (405nm), 5% (488nm), 7% (561nm) and 20% (633nm), with gain set at 750.

650

### 651 **Live confocal imaging**

652 Virgin females maternally expressing MCP-GFP and H2Av-RFP were crossed with males of the  
653 MS2 reporter lines. 0-1 hour embryos were collected, dechorionated, and transferred onto a  
654 breathable membrane (Lumox Film, Sarstedt AG & Co.) in the middle of a plastic microscope  
655 slide (3D printed on Ender 3 Pro, Creality). Live imaging was performed using a LSM Zeiss 880  
656 63X objective lens with the following settings: optical sections: 1024x1024 pixels, 20z stacks  
657 0.7µm apart, 12bit; zoom: 1.0; time resolution: 25 seconds per frame. Laser power was set at  
658 0.6% (488nm), and 0.4% (561nm) with gain set at 800. Embryos were imaged for approximately  
659 one hour, typically from NC12 to late NC14.

660

## 661 **Image analysis, quantification and statistical analysis**

662 Processing for images followed a pipeline started with feature extraction using standard tools in  
663 Imaris, then data exported to .csv files for organization, further processing, and plotting. For  
664 pMAD experiments, nuclei positions were obtained using the “spots” function with an estimated  
665 diameter of 4um, and a Z-axis diameter of 7um, with background subtraction enabled. Spot  
666 positions were restricted to an area of interest approximately 75% to 25% of egg length.  
667 Fluorescence intensity from the pMAD channel at all spot positions was extracted and  
668 processed using the “pMAD\_quant.R” script. This script aligned, plotted, and extracted gradient  
669 widths from all pMAD gradients measured.

670

671 For smFISH experiments, nuclei positions were instead obtained using the “volume”, with a  
672 surface detail parameter set at 0.2um, and background subtraction enabled. Foci of *sog*  
673 smFISH signal were obtained using the “spots” function, with an estimated diameter of 0.5um  
674 and a Z-axis diameter of 1. Alleles were discriminated by analysis of MS2 signal at spot  
675 locations, and thresholds were set manually by examining the separation between the two  
676 populations. Foci were assigned to single nuclei by finding the nearest nucleus in 3D space to  
677 each focus. Nuclei with more than two assigned foci were excluded from the analysis, and  
678 represented less than 1% of the data.

679

680 Live imaging analysis was performed on Imaris by tracking nuclei using the “spots” function with  
681 an estimated diameter of 4um and a Z-axis diameter of 6um. Tracking was performed using the  
682 “retrograde motion,” with a max allowable gap of 1, and a max allowable displacement of 10um.  
683 Foci were also tracked using the “spots” function with an estimated diameter of 1.3um and a Z-  
684 axis diameter of 2um. Tracking was performed using the “retrograde motion,” with a max  
685 allowable gap of 0, and a max allowable displacement of 2.5um. Spots were filtered by inclusion  
686 of foci with “Quality” scores greater than 33.0, median RFP fluorescence greater than 200 AU,  
687 mean GFP fluorescence greater than 250 AU, and a distance from the xy-border greater than  
688 1um. All tracking data, including position and mean GFP fluorescence was exported to .csv files  
689 for further analysis in R.

690

691 Foci were assigned to nuclei by finding minimum distance between foci and nuclei.  
692 Subsequently, any nuclei that came within 3um of the xy-border were filtered out to reduce edge  
693 effects. Nuclear cycle times and D/V axis relative positions to the mesoderm were annotated

694 manually and stored in a separate .csv file. Nuclei were assigned into positional bins by taking  
695 the difference between the annotated mesoderm y-coordinate and the average position of the  
696 nucleus for each nuclear cycle.  $t_{on}$  values for NC13 and NC14 were obtained by subtracting the  
697 time GFP foci were first detected from the annotated cycle time of the respective nuclear cycle.  
698 Loading rates were estimated by fitting a linear model to the first five timepoints of the GFP foci  
699 intensity. Negative values were discarded, and represented less than 5% of the data. Total  
700 output values were calculated by multiplying each nucleus' loading rate by the total time that foci  
701 was detected, with a max allowable time of 25 minutes in NC14 to account for differences in  
702 imaging time between each movie. These values were then averaged for each positional bin,  
703 and multiplied by the percentage of active nuclei in the corresponding bin.

704

### 705 **Plotting**

706 All plots were generated using base R plotting functions. All error bars were computed using the  
707 standard error of the mean (s.e.m.).

708

### 709 **Modeling**

710 Models of activation were constructed by fitting gamma distributions to measured  $t_{on}$  and  $t_{off}$   
711 values using the function `fitdist()` included in the "fitdistrplus" library. Fits were achieved via  
712 maximum likelihood estimation. The shape and rate of each distribution was extracted, and  
713 used to construct new distributions of values which were sampled independently to generate  
714 simulated  $t_{on}$  and  $t_{off}$  values. Distribution parameters were subsequently refined by comparing  
715 simulated nuclei to measured activation traces for each bin. New sets of potential shapes and  
716 rates for each distribution were generated by allowing each parameter to vary by up to 20%,  
717 and selecting new shape and rate values based on which parameters minimized the residuals  
718 between the prediction generated by the model and data.

719

720 During simulation, each nucleus was assigned a  $t_{on}$  value and  $t_{off}$  value generated from the  
721 corresponding distribution. At each timepoint, the number of nuclei that had a  $t_{on}$  value less than  
722 the current time, and a  $t_{off}$  value greater than the current time were considered "on". The number  
723 of nuclei "on" was divided by the total number of nuclei in the simulation, generating the value of  
724 the proportion of nuclei active for that timepoint. If the assigned  $t_{off}$  value was less than the  
725 assigned  $t_{on}$  value, the nucleus was considered "off" at every timepoint. This allowed us to  
726 account for nuclei which never activate transcription without skewing the distribution of  $t_{on}$ , which  
727 was critical to accurately simulate the ventral bins.

728

729 For the combined model, nuclei were assigned two  $t_{on}$  and  $t_{off}$  values each sampled from the two  
730 different enhancer deletion distributions. Nuclei were evaluated in the same manner as  
731 described above, but only required one enhancer's values to meet the criteria of "on" to be  
732 considered as such. All simulations were carried out using a set of 10,000 nuclei, which  
733 represented a compromise between accuracy of prediction and computing power.

734

735

### 736 **Acknowledgements**

737 The authors would like to thank Sevinc Ercan for many insightful suggestions over the course of  
738 this study, and Enrique Rojas for helpful discussions of our model. The authors also thank  
739 Michelle Lanis Pollack, Alicia Lina Zhu, Yandel Morel, Lauren Stafford, and Dhruvansh Shah for  
740 their tireless help with embryo collection and PCR screening for crispants, and Caichen Duan  
741 for help with the live imaging.

742

### 743 **Competing Interests**

744 The authors have no competing interests.

745

### 746 **Author Contributions**

747 All authors contributed to the experiments. PHW and CAR designed the study. PHW carried out  
748 the image analysis and modeling, and prepared manuscript figures and first draft. PHW and  
749 CAR revised the manuscript.

750

### 751 **Funding**

752 The research was supported by National Institutes of Health research grants RO1GM63024 to  
753 CAR and T32HD7520 Training Program in Developmental Genetics to PHW.

754

### 755 **Data and Code Availability**

756 Imaris generated .csv files and R scripts can be found at:

757 <https://rushlowlab.bio.nyu.edu/research/>

758 For any detailed procedures for required file headers or help implementing these scripts please  
759 contact the Rushlow lab directly.

760

761

762 REFERENCES

- 763 **Berghammer, A. J., Klingler, M. and Wimmer, E. A.** (1999). A universal marker for transgenic  
764 insects. *Nature* **402**, 370–371.
- 765 **Dorfman, R. and Shilo, B. Z.** (2001). Biphasic activation of the BMP pathway patterns the  
766 *Drosophila* embryonic dorsal region. *Development* **128**, 965–972.
- 767 **Dunipace, L., Ákos, Z. and Stathopoulos, A.** (2019). Coacting enhancers can have  
768 complementary functions within gene regulatory networks and promote canalization. *PLoS*  
769 *Genet.* **15**, e1008525.
- 770 **El-Sherif, E. and Levine, M.** (2016). Shadow Enhancers Mediate Dynamic Shifts of Gap Gene  
771 Expression in the *Drosophila* Embryo. *Curr. Biol.* **26**, 1164–1169.
- 772 **Fakhouri, W. D., Ay, A., Sayal, R., Dresch, J., Dayringer, E. and Arnosti, D. N.** (2010).  
773 Deciphering a transcriptional regulatory code: modeling short-range repression in the  
774 *Drosophila* embryo. *Mol. Syst. Biol.* **6**, 341.
- 775 **Foo, S. M., Sun, Y., Lim, B., Ziukaite, R., O'Brien, K., Nien, C.-Y., Kirov, N., Shvartsman, S.**  
776 **Y. and Rushlow, C. A.** (2014). Zelda potentiates morphogen activity by increasing  
777 chromatin accessibility. *Curr. Biol.* **24**, 1341–1346.
- 778 **Frankel, N., Davis, G. K., Vargas, D., Wang, S., Payre, F. and Stern, D. L.** (2010). Phenotypic  
779 robustness conferred by apparently redundant transcriptional enhancers. *Nature* **466**, 490–  
780 493.
- 781 **Fukaya, T.** (2021). Dynamic regulation of anterior-posterior patterning genes in living  
782 *Drosophila* embryos. *Curr. Biol.* **31**, 2227–2236.e6.
- 783 **Garcia, H. G., Tikhonov, M., Lin, A. and Gregor, T.** (2013). Quantitative imaging of  
784 transcription in living *Drosophila* embryos links polymerase activity to patterning. *Curr. Biol.*  
785 **23**, 2140–2145.
- 786 **Hong, J.-W., Hendrix, D. A. and Levine, M. S.** (2008). Shadow enhancers as a source of  
787 evolutionary novelty. *Science* **321**, 1314.
- 788 **Hoppe, C., Bowles, J. R., Minchington, T. G., Sutcliffe, C., Upadhyai, P., Rattray, M. and**  
789 **Ashe, H. L.** (2020). Modulation of the Promoter Activation Rate Dictates the Transcriptional  
790 Response to Graded BMP Signaling Levels in the *Drosophila* Embryo. *Dev. Cell* **54**, 727–  
791 741.e7.
- 792 **Keller, S. A., Mao, Y., Struffi, P., Margulies, C., Yurk, C. E., Anderson, A. R., Amey, R. L.,**  
793 **Moore, S., Ebels, J. M., Foley, K., et al.** (2000). dCtBP-dependent and -independent  
794 repression activities of the *Drosophila* Knirps protein. *Mol. Cell. Biol.* **20**, 7247–7258.
- 795 **Kvon, E. Z., Waymack, R., Gad, M. and Wunderlich, Z.** (2021). Enhancer redundancy in  
796 development and disease. *Nat. Rev. Genet.* **22**, 324–336.
- 797 **Lieberman, L. M. and Stathopoulos, A.** (2009). Design flexibility in cis-regulatory control of  
798 gene expression: synthetic and comparative evidence. *Dev. Biol.* **327**, 578–589.



- 799 **Nibu, Y., Zhang, H., Bajor, E., Barolo, S., Small, S. and Levine, M.** (1998). dCtBP mediates  
800 transcriptional repression by Knirps, Krüppel and Snail in the Drosophila embryo. *EMBO J.*  
801 **17**, 7009–7020.
- 802 **Perry, M. W., Boettiger, A. N., Bothma, J. P. and Levine, M.** (2010). Shadow enhancers  
803 foster robustness of Drosophila gastrulation. *Curr. Biol.* **20**, 1562–1567.
- 804 **Perry, M. W., Boettiger, A. N. and Levine, M.** (2011). Multiple enhancers ensure precision of  
805 gap gene-expression patterns in the Drosophila embryo. *Proc. Natl. Acad. Sci. U. S. A.*  
806 **108**, 13570–13575.
- 807 **Rushlow, C., Colosimo, P. F., Lin, M. C., Xu, M. and Kirov, N.** (2001). Transcriptional  
808 regulation of the Drosophila gene *zen* by competing Smad and Brinker inputs. *Genes Dev.*  
809 **15**, 340–351.
- 810 **Scholes, C., Biette, K. M., Harden, T. T. and DePace, A. H.** (2019). Signal Integration by  
811 Shadow Enhancers and Enhancer Duplications Varies across the Drosophila Embryo. *Cell*  
812 *Rep.* **26**, 2407–2418.e5.
- 813 **Sheng, G., Thouvenot, E., Schmucker, D., Wilson, D. S. and Desplan, C.** (1997). Direct  
814 regulation of rhodopsin 1 by Pax-6/eyeless in Drosophila: evidence for a conserved function  
815 in photoreceptors. *Genes Dev.* **11**, 1122–1131.
- 816 **Shimmi, O., Umulis, D., Othmer, H. and O'Connor, M. B.** (2005). Facilitated Transport of a  
817 Dpp/Scw Heterodimer by Sog/Tsg Leads to Robust Patterning of the Drosophila  
818 Blastoderm Embryo. *Cell* **120**, 873–886.
- 819 **Stathopoulos, A. and Newcomb, S.** (2020). Setting up for gastrulation: D. melanogaster. *Curr.*  
820 *Top. Dev. Biol.* **136**, 3–32.
- 821 **Sun, Y., Nien, C.-Y., Chen, K., Liu, H.-Y., Johnston, J., Zeitlinger, J. and Rushlow, C.**  
822 (2015). Zelda overcomes the high intrinsic nucleosome barrier at enhancers during  
823 Drosophila zygotic genome activation. *Genome Res.* **25**, 1703–1714.
- 824 **Sutherland, D. J., Li, M., Liu, X.-Q., Stefancsik, R. and Raftery, L. A.** (2003). Stepwise  
825 formation of a SMAD activity gradient during dorsal-ventral patterning of the Drosophila  
826 embryo. *Development* **130**, 5705–5716.
- 827 **Treen, N., Shimobayashi, S. F., Eeftens, J., Brangwynne, C. P. and Levine, M.** (2021).  
828 Properties of repression condensates in living Ciona embryos. *Nat. Commun.* **12**, 1561.
- 829 **Tsai, A., Alves, M. R. and Crocker, J.** (2019). Multi-enhancer transcriptional hubs confer  
830 phenotypic robustness. *Elife* **8**, e45325.
- 831 **Vincent, B. J., Staller, M. V., Lopez-Rivera, F., Bragdon, M. D. J., Pym, E. C. G., Biette, K.**  
832 **M., Wunderlich, Z., Harden, T. T., Estrada, J. and DePace, A. H.** (2018). Hunchback is  
833 counter-repressed to regulate even-skipped stripe 2 expression in Drosophila embryos.  
834 *PLoS Genet.* **14**, e1007644.
- 835 **Wang, Y.-C. and Ferguson, E. L.** (2005). Spatial bistability of Dpp-receptor interactions during  
836 Drosophila dorsal-ventral patterning. *Nature* **434**, 229–234.
- 837 **Yamada, S., Whitney, P. H., Huang, S.-K., Eck, E. C., Garcia, H. G. and Rushlow, C. A.**

838 (2019). The *Drosophila* Pioneer Factor Zelda Modulates the Nuclear Microenvironment of a  
839 Dorsal Target Enhancer to Potentiate Transcriptional Output. *Curr. Biol.* **29**, 1387–1393.e5.

840

841

## 842 **FIGURE LEGENDS**

843

### 844 **Fig. 1. Early activation of *sog* is driven by two shadow enhancers.**

845 (A) Schematic representation of the *sog* locus. Previous studies have identified two enhancers  
846 that drive *sog* transcription (Dunipace et al., 2019). The proximal (green) enhancer located in  
847 the first intron of *sog* ~2kb downstream of the promoter, and the distal enhancer (blue) located  
848 20kb upstream of the promoter. (B) Transcription factor binding sites relevant to the expression  
849 of *sog*. Both enhancers contain binding sites for Zld (gold), Df (dark green), and Sna (plum). All  
850 sites are present in roughly equal number, but vary in their position within each enhancer. (C)  
851 All enhancer lines created for this study. Each line contains a 1.2kb insertion of 24x MS2 loops  
852 located immediately downstream of the proximal enhancer.  $\Delta PsogMS2$  and  $\Delta P\Delta DsogMS2$   
853 replace the proximal enhancer with spacer DNA computationally depleted for early blastoderm  
854 transcription factor binding sites (Scholes et al., 2019) to maintain the spacing between the  
855 promoter and the MS2 loops.  $\Delta DsogMS2$  and  $\Delta P\Delta DsogMS2$  replace the distal enhancer with a  
856 3xP3 reporter construct for the purpose of screening mutant alleles. For each line,  
857 representative colorimetric *in situ* stainings for *sog* transcripts are shown in ventral lateral views.  
858 Lethal counts performed on all lines are listed besides each image.  $\Delta P\Delta DsogMS2$  produced no  
859 viable homozygous females or hemizygous males, and are therefore assumed to have a fully  
860 penetrant lethal phenotype.

861

### 862 **Fig. 2. Internally controlled smFISH assay identifies spatial preference of each enhancer.**

863 (A) Crossing scheme used for all MS2 labeled lines. The location of exonic smFISH probe set  
864 (magenta) targets the first exon of *sog*, labeling both alleles, while the intronic smFISH probe  
865 set (cyan) targets only the MS2 sequence found in our engineered lines. (B) Schematic view of  
866 a single nucleus diagramming the expected allele labeling using the two probe sets. (C)  
867 Maximum intensity projection of z-stack images showing the region of the Df gradient imaged.  
868 DAPI (white) labels nuclei, anti-Df antibody (green) shows the Df morphogenic gradient, MS2  
869 probe (cyan) shows our MS2 tagged allele, and *sog* probe (magenta) shows all active *sog*  
870 transcription. Cut-out shows a single nucleus, matching the expectation of labeling in (B). (D)  
871 Log fold change calculated in each nucleus by taking the log ratio of the wildtype allele *sog*

872 nascent transcript staining intensity over the MS2 allele *sog* nascent transcript staining intensity.  
873 Measurements were performed across the DI gradient for *WTsogMS2* (orange),  $\Delta P_{sog}MS2$   
874 (blue), and  $\Delta D_{sog}MS2$  (green). Shaded region with dashed line shows the location of the  
875 presumptive mesoderm. Error bars: s.e.m. (E) Quantification of the percentage of all active MS2  
876 alleles regardless of the state of the wildtype allele. (F) Quantification of the percentage of all  
877 active MS2 alleles in nuclei with no detectable wildtype allele transcription.

878

879 **Fig. 3. MS2 live imaging reveals differences in activation from NC12 to NC14.**

880 (A) Schematic of intronic MS2 loops reporting on live transcription. MS2 loops (blue hairpins)  
881 are transcribed and serve as binding sites for MCP-GFP (pink dots). Loops are spliced co-  
882 transcriptionally and are degraded by RNA-exonucleases (black circular sector). (B) Region of  
883 the embryo imaged during live imaging. Imaging volume of 135 $\mu$ m by 135 $\mu$ m by 15 $\mu$ m was  
884 positioned ventral/laterally to capture ventral repression as seen in late NC14 in order to orient  
885 nuclei across the D/V axis. Embryos were imaged for approximately 1 hour across NC12 to  
886 NC14. (C) Stills taken from live imaging movie of *WTsogMS2* Active transcription was  
887 determined by the appearance of MCP-GFP foci (pink) in nuclei marked by H2aV-RFP (white).  
888 Scale bar: 10 $\mu$ m. (D) Quantification of number of nuclei with active transcription for *WTsogMS2*  
889 (orange),  $\Delta P_{sog}MS2$  (blue), and  $\Delta D_{sog}MS2$  (green). Percentage of active nuclei were  
890 measured in the ventral region (mesoderm), ventral/lateral region, dorsal/lateral region, and  
891 dorsal region of the *sog* transcriptional domain. Error bars: s.e.m.

892

893 **Fig. 4. Internal kinetic parameters are modified by individual enhancers.**

894 (A) Maximum intensity projections of a single nucleus tracked over time.  $t_{on}$  is determined by the  
895 first appearance of a MCP-GFP focus (pink) inside a H2aV-RFP labeled nucleus (white). The  
896 first 5 timepoints of a track focus (purple line) are used to determine the relative RNA Pol II  
897 loading rate.  $t_{off}$  represents the timepoint at which a focus can no longer be detected. (B) Signal  
898 intensity over time of the MCP-GFP focus tracked in (A). Loading rate is found by fitting a linear  
899 model (purple line) to the first five timepoints after  $t_{on}$ . (C)  $t_{on}$  times for across the D/V axis for  
900 *WTsogMS2* (orange),  $\Delta P_{sog}MS2$  (blue), and  $\Delta D_{sog}MS2$  (green) at NC13 (left) and NC14  
901 (right). Shaded region of the graph represents the mesoderm. Error bars: s.e.m. for all nuclei.  
902 (D) Relative loading rates measured across the D/V axis for all genotypes at NC13 (left) and  
903 NC14 (right). (E) Schematic diagram demonstrating how total transcriptional output is  
904 calculated. (F) Total output measured across the D/V axis for all genotypes at NC13 (left) and  
905 NC14 (right).

906  
907 **Fig. 5. Modeling the activities of individual enhancers reveals potential synergy of Sna-**  
908 **mediated repression.**

909 (A) Activation over time of all genotypes in the lateral region of the embryo at NC14. Model fits  
910 (solid lines) based on simulations of 10,000 nuclei generated by sampling  $t_{on}$  and  $t_{off}$   
911 distributions superimposed over data (open circles). Histograms of  $t_{on}$  (red) and  $t_{off}$  (blue) values  
912 used to perform simulations shown to the left. (B) Schematic representation of modeling  
913 *WtsogMS2* activation over time using  $t_{on}$  and  $t_{off}$  values from enhancer deletion distributions.  
914 Active transcription (purple foci) is maintained by the sequential and overlapping activity of  
915 individual enhancers. Enhancer activity (proximal in green, distal in blue) is defined by  $t_{on}$  and  $t_{off}$   
916 values derived from each enhancer's fit distributions. (C) Output of combined model of non-  
917 interacting enhancers (black line) compared to activation data from *WtsogMS2* (orange line).  
918 Each graph contains data from different spatial bins across the D/V axis.

919  
920 **Fig. 6. *sog* enhancer deletions show differential downstream effects on the pMAD**  
921 **gradient and pMAD target gene expression.**

922 (A) Schematic of the downstream signaling controlled by *sog*. Sog protein diffuses dorsally from  
923 the ventral-lateral *sog* domain (dark purple) where it encounters and sequesters ventrally  
924 diffusing Dpp emanating from the pMAD domain (green). Sog also localizes Dpp to the dorsal  
925 midline (Shimmi et al., 2005; Wang and Ferguson, 2005). Genetic interactions of the  
926 components of this pathway are shown to the right. pMAD acts as a transcription factor on  
927 target genes *hnt* and *ush*. (B) Dorsal views of mid and late NC14 homozygous *WtsogMS2*  
928 embryos stained with anti-1/5 pMAD antibody (green) and DAPI (white). Late embryos are  
929 identified by irregular nuclei shape and the appearance of the ventral furrow. Scale bars: 20 $\mu$ m.  
930 (C) pMAD staining intensity across the dorsal midline of the embryo for *WtsogMS2* (orange),  
931  $\Delta P$ *sogMS2* (blue),  $\Delta D$ *sogMS2* (green) and  $\Delta P\Delta D$ *sogMS2* (purple). Each embryo is centered  
932 based on the point of highest pMAD intensity. Error bars: s.e.m. (D) Quantification of pMAD  
933 domain width for all genotypes in mid and late NC14 embryos. Domain width is determined by  
934 measuring the point at which pMAD staining intensity is above 50% of max intensity. Error bars:  
935 s.e.m. (E) Evaluation of pMAD target genes on all genetic backgrounds. Conventional  
936 colorimetric *in situ* hybridizations were performed on NC14 embryos. *ush* and *hnt* were chosen  
937 as representative early and late genes, respectively (Hoppe et al., 2020).

938

Figure 1

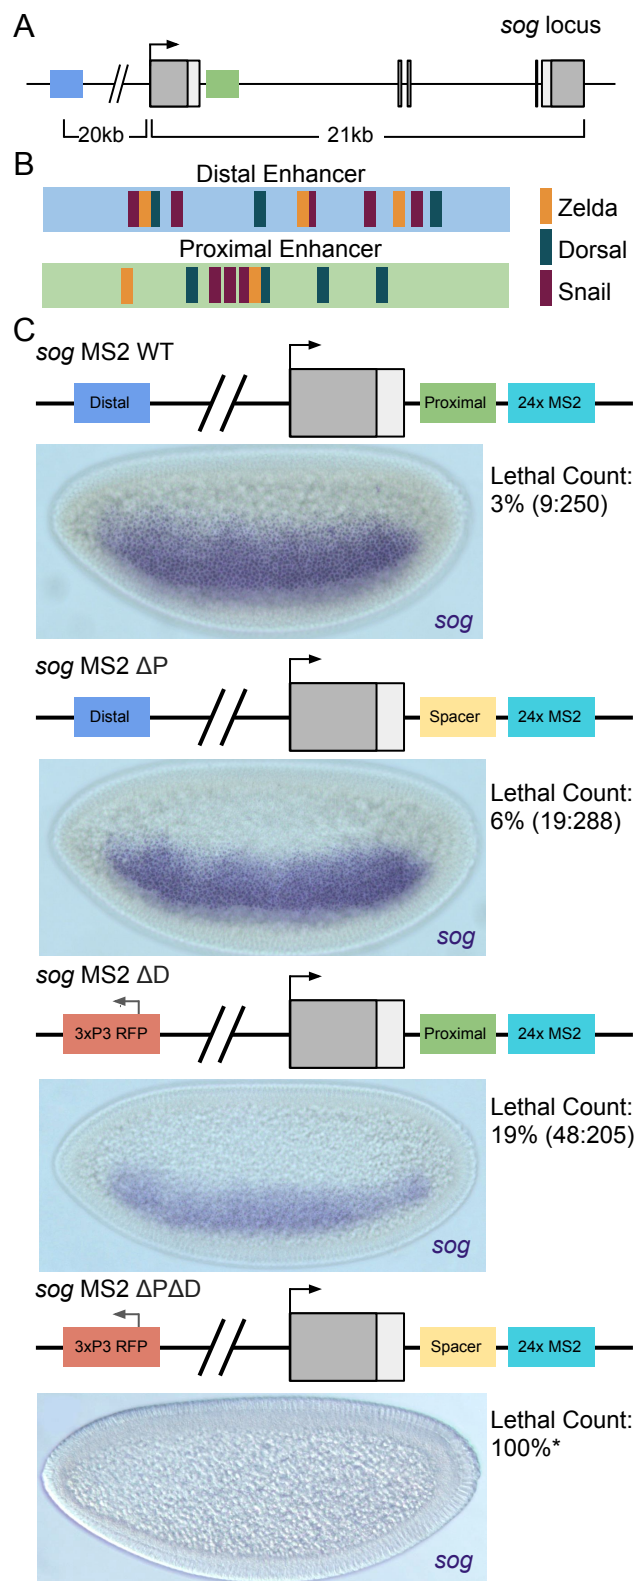

Figure 2

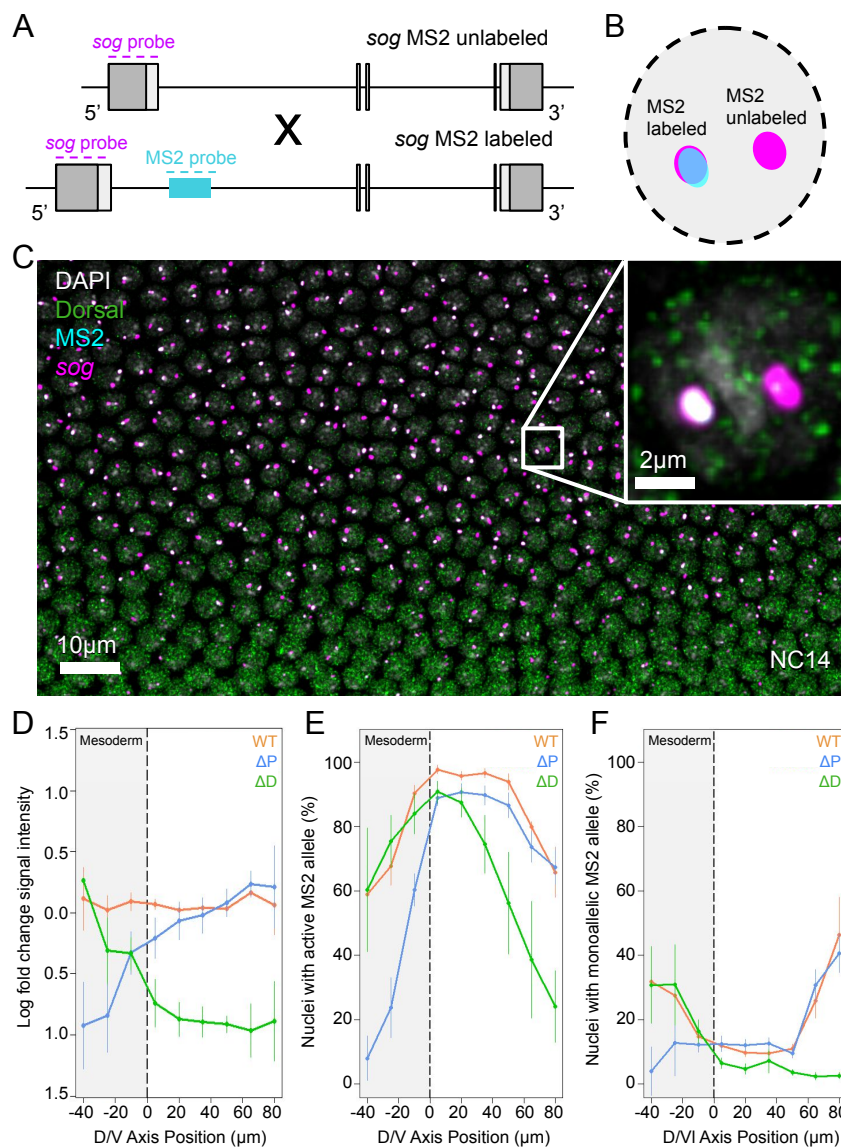

### Figure 3

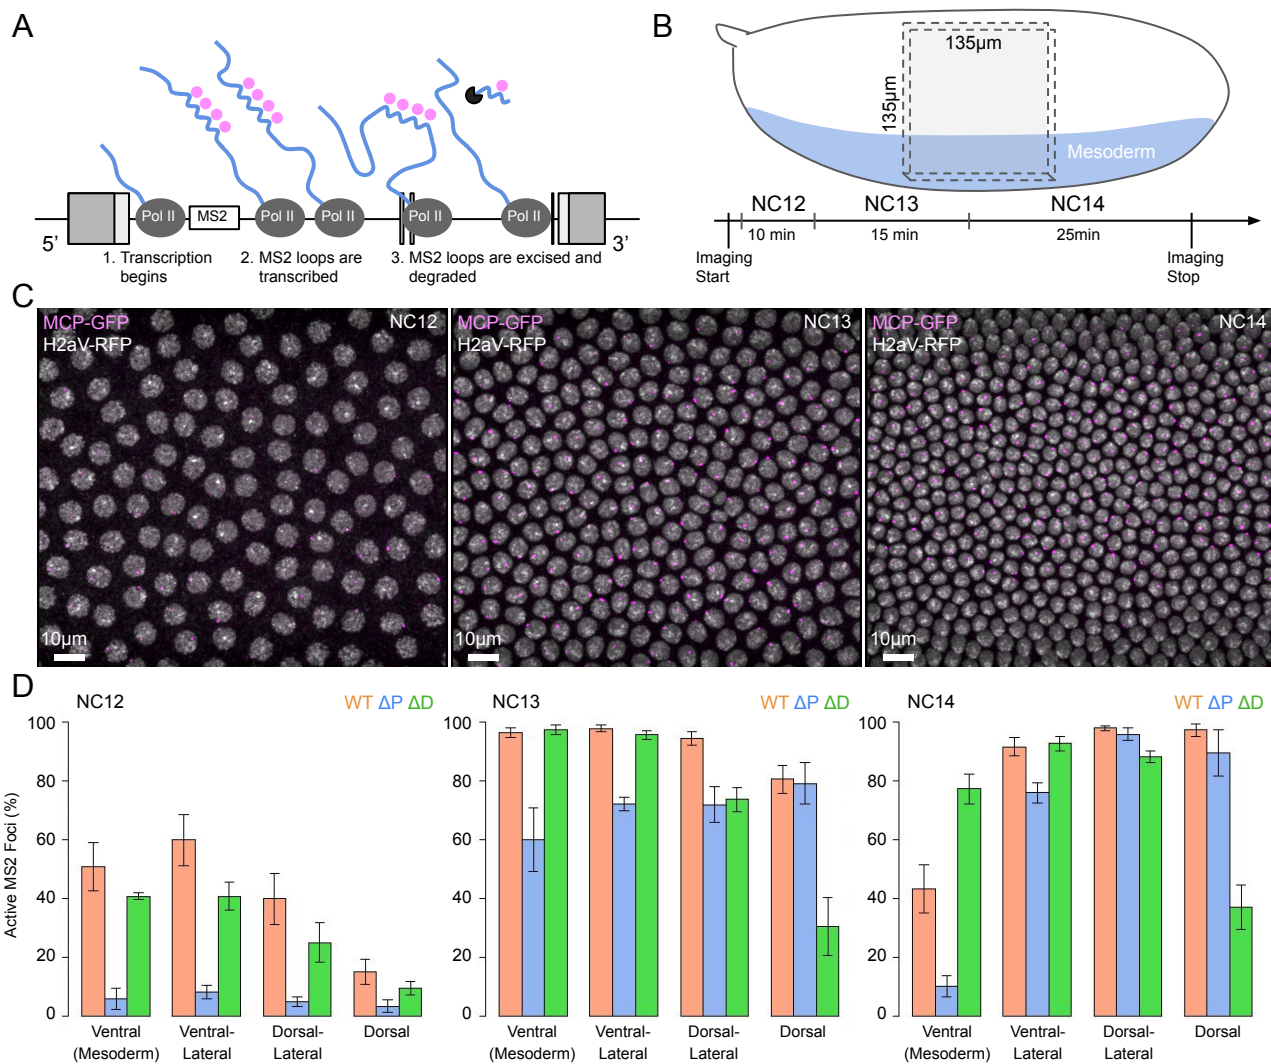

Figure 4

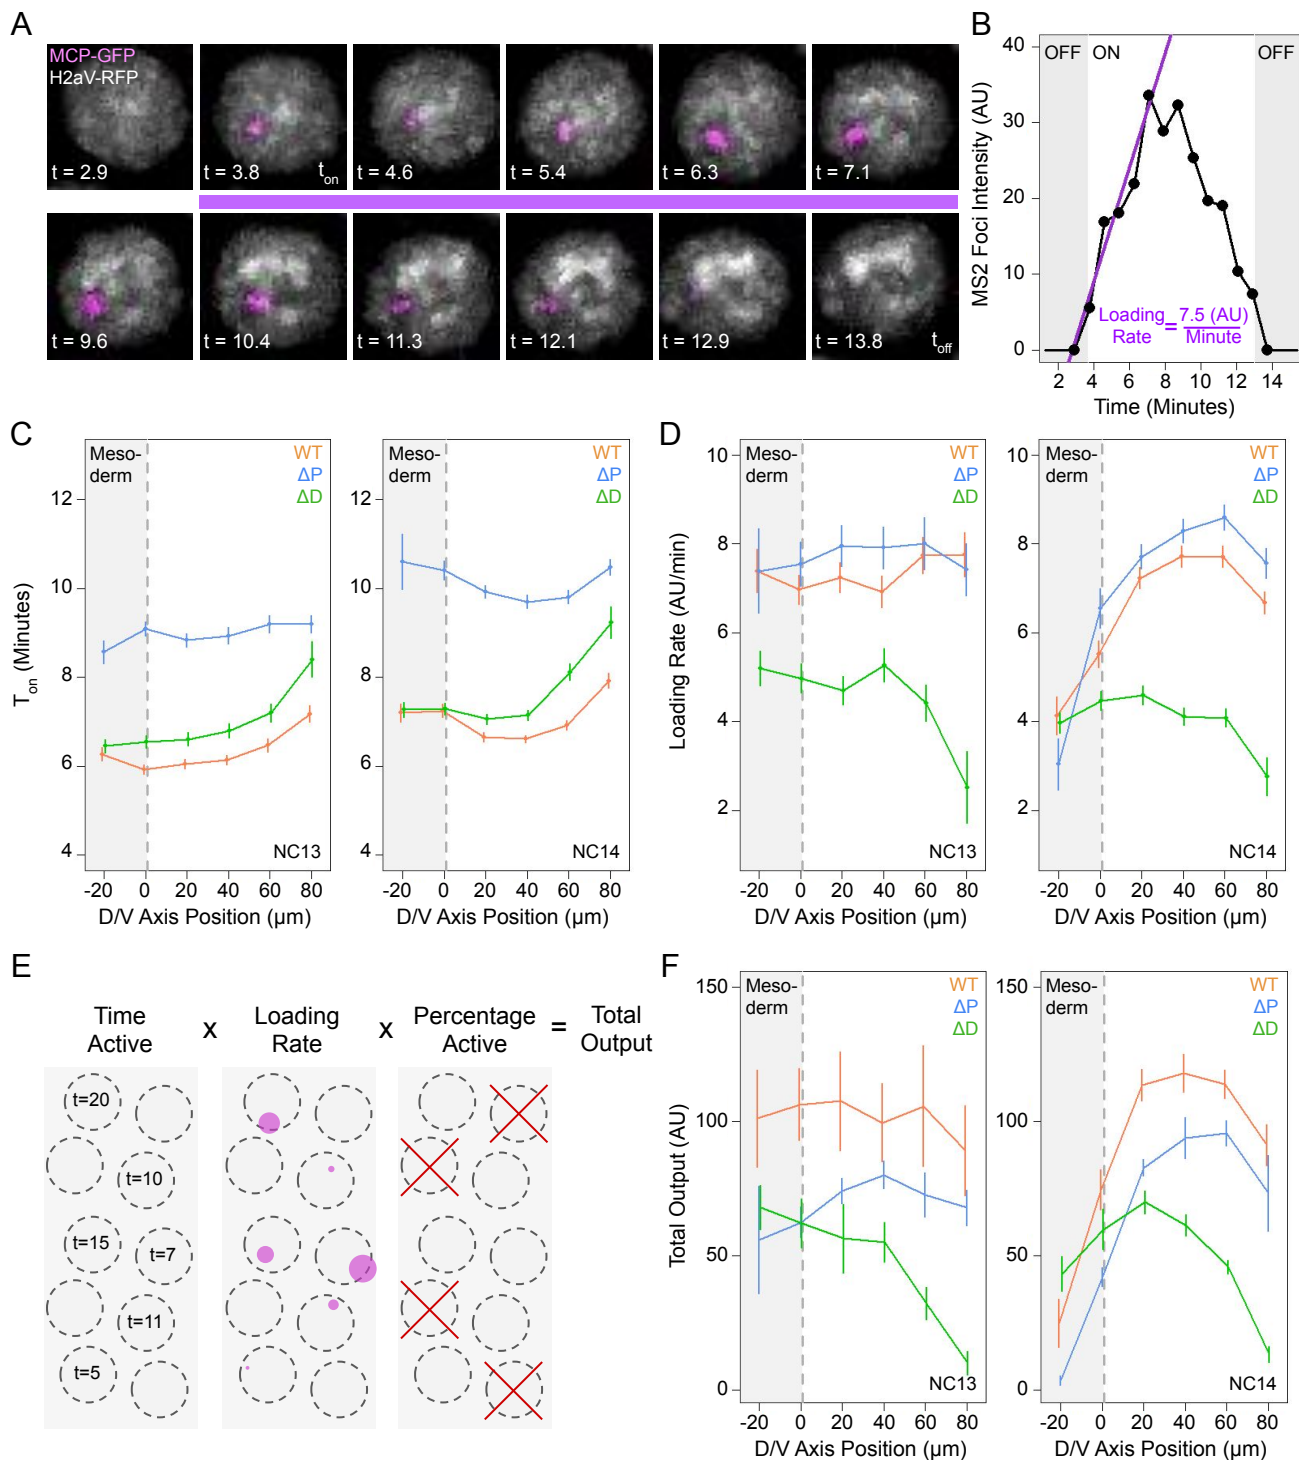



Figure 5

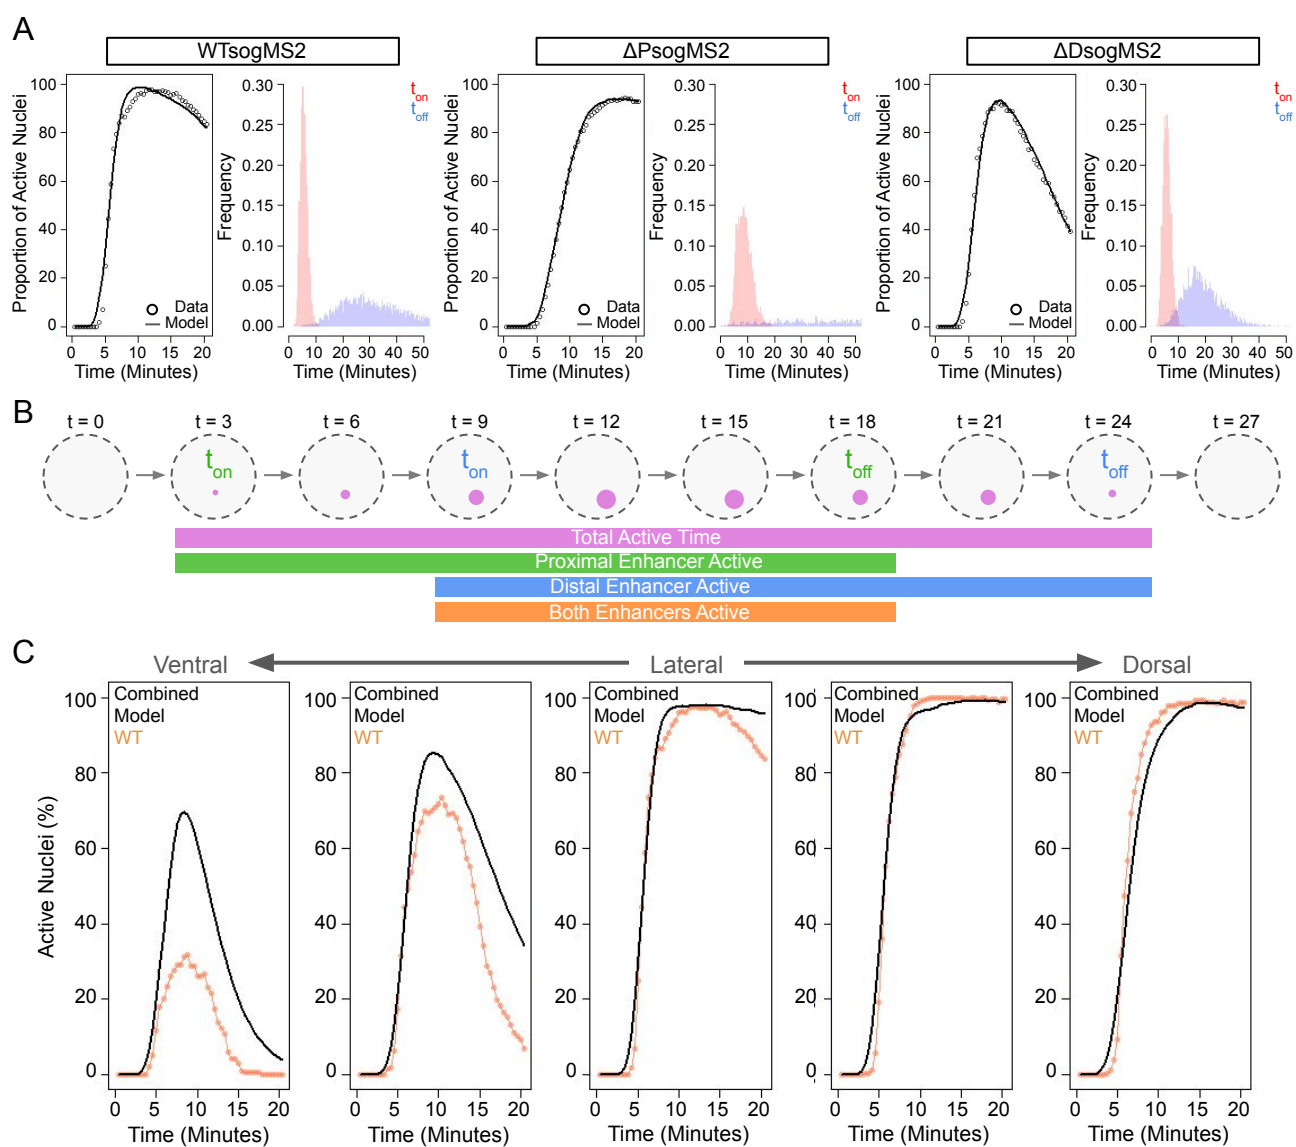

Figure 6

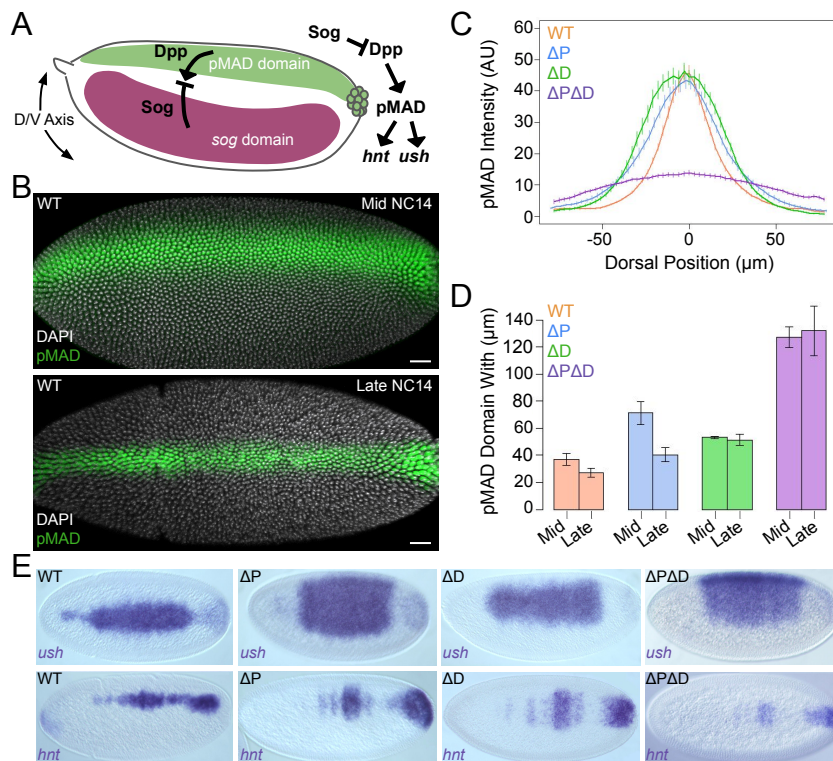

Source: https://www.biorxiv.org/content/10.1101/2022.05.12.491703v1.full.pdf
